# Supplementary material for: Characterization of antibiotic resistomes by reprogrammed bacteriophage-enabled functional metagenomics in clinical strains
Source: Springer Nature journal article supplement (doi:10.1038/s41564-023-01320-2), 2023-02-09
Supplement: MOESM1 [file 41564_2023_1320_MOESM1_ESM.pdf]

# Characterization of antibiotic resistomes by reprogrammed bacteriophage-enabled functional metagenomics in clinical strains

---

In the format provided by the  
authors and unedited

## Supplementary Information

### Extended Data Files

Extended Data Table 1: List of antibiotics used in this study. Seven recent antibiotics were selected based on WHO reports (<https://www.who.int/publications/i/item/9789240021303>) and commercial availability.

### Supplementary Tables

Supplementary Table 1: Sources of the metagenomics libraries

Supplementary Table 2: Library sizes achieved by electroporation and transduction

Supplementary Table 3: Read lengths and diversities of the contigs in the three libraries

Supplementary Table 4: Position of potential HRDR regions of the tail fibers and transduction efficiencies of phages with mutagenised tail fibers

Supplementary Table 5: Transduction efficiencies and plaque formation in *S. sonnei* and *E. coli* by the wild type and mutant versions of T7 phage

Supplementary Table 6: List of contigs identified in the functional selection screens

Supplementary Table 7: List of ARG clusters identified in the functional selection screens

Supplementary Table 8: Mobile gene pool Tablebase

Supplementary Table 9: MIC fold changes provided by the 20 selected contigs

Supplementary Table 10: List of ARG clusters identified in the functional selection screens of the pre-selected plasmid libraries

Supplementary Table 11: List of plasmids and primers used in the study

### Source Data Extended Data Figures

Source Data Extended Data Figure 1: Uncropped scan of gel picture on Extended Data Figure 1 (*Klebsiella pneumoniae* NCTC 9131 + Soil library by K11 phage)

Source Data Extended Data Figure 2. Uncropped scan of gel picture on Extended Data Figure 1 (*Salmonella enterica* subsp. *enterica* serovar Typhimurium str. LT2 + Gut library by  $\Phi$ SG-JL2 phage)

Source Data Extended Data Figure 3. Uncropped scan of gel picture on Extended Data Figure 1 (*Salmonella enterica* subsp. *enterica* serovar Typhimurium str. LT2 + Clinical library by  $\Phi$ SG-JL2 phage)

Source Data Extended Data Figure 4. Uncropped scan of gel picture on Extended Data Figure 1 (Electroporation into *Escherichia coli* K12 BW25113)
